# Supplementary material for: Phylogeography reveals an ancient cryptic radiation in East-Asian tree frogs (Hyla japonica group) and complex relationships between continental and island lineages
Source: PubMed Central journal article supplement (PMC5121986; doi:10.1186/s12862-016-0814-x), 2016-11-23

**Additional file 2: Maximum credibility cladogram from the mitochondrial dating analysis in BEAST.**

Calibration points in the European radiation are indicated by arrows, following estimates from Stöck *et al.* [25].

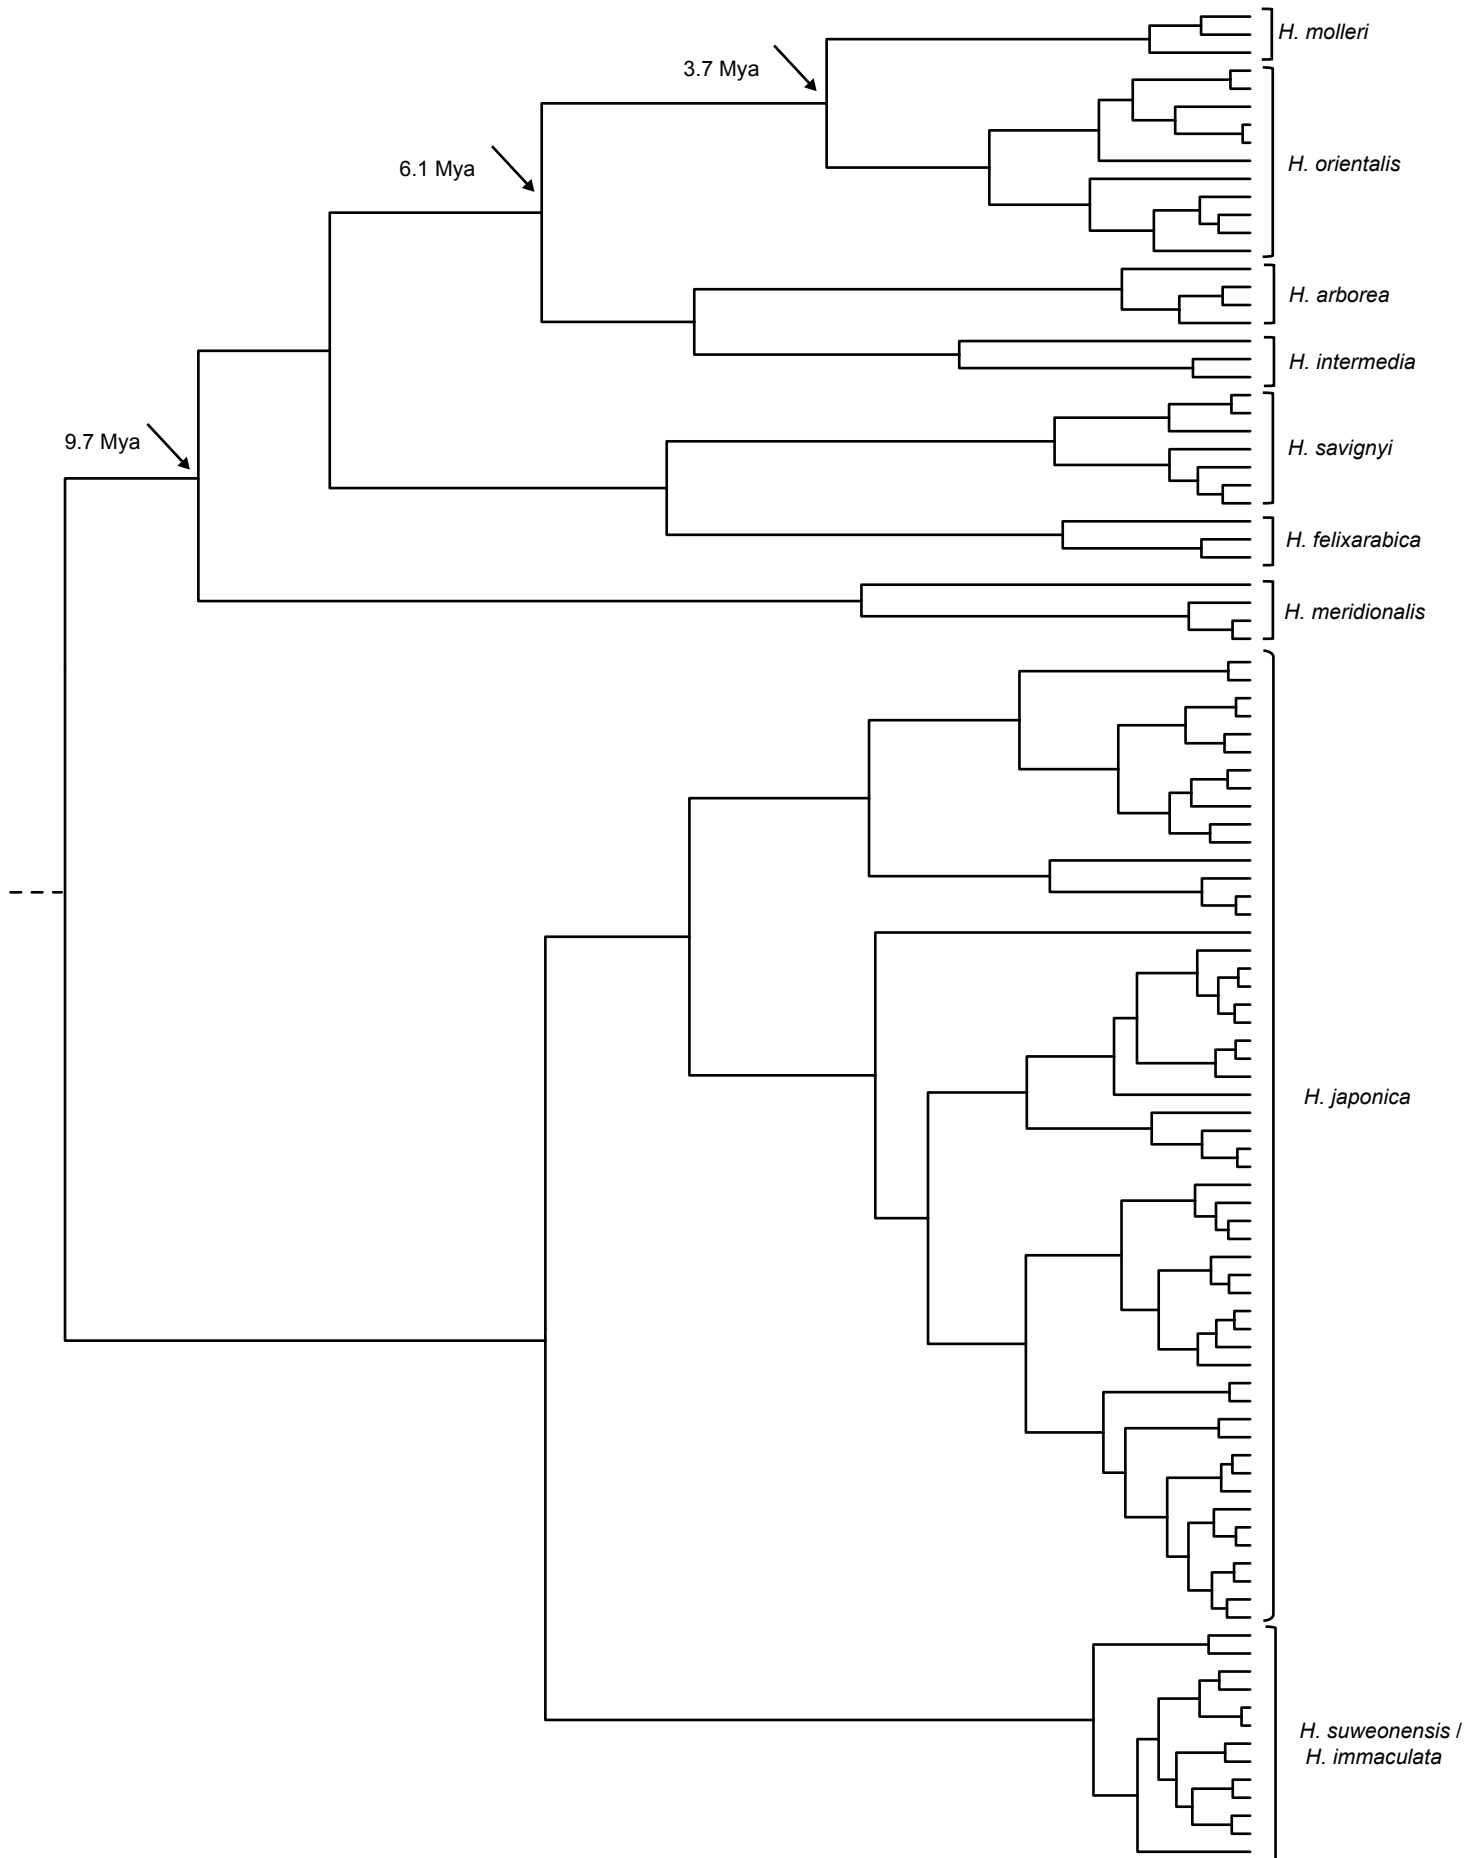

Supplement: 12862_2016_814_MOESM2_ESM.pdf [file 12862_2016_814_MOESM2_ESM.pdf]
