# Supplementary material for: Phylogeography reveals an ancient cryptic radiation in East-Asian tree frogs (Hyla japonica group) and complex relationships between continental and island lineages
Source: PubMed Central journal article supplement (PMC5121986; doi:10.1186/s12862-016-0814-x), 2016-11-23
Supplement: 12862_2016_814_MOESM4_ESM.pdf [file 12862_2016_814_MOESM4_ESM.pdf]

## Additional file 4: Mitochondrial genetic distances (*D<sub>xy</sub>*) between and within Eastern tree frog taxa

### Between taxa

---

|                                              | <i>H. immaculata</i> / <i>H. suweonensis</i> | <i>H. japonica</i> A | <i>H. japonica</i> B |
|----------------------------------------------|----------------------------------------------|----------------------|----------------------|
| <i>H. immaculata</i> / <i>H. suweonensis</i> | -                                            |                      |                      |
| <i>H. japonica</i> A                         | 0.135                                        | -                    |                      |
| <i>H. japonica</i> B                         | 0.128                                        | 0.104                | -                    |

---

### Within *H. japonica* taxon A

---

|    | A1    | A2    | A3    | A4 |
|----|-------|-------|-------|----|
| A1 | -     |       |       |    |
| A2 | 0.036 | -     |       |    |
| A3 | 0.066 | 0.055 | -     |    |
| A4 | 0.070 | 0.064 | 0.036 | -  |

---

### Within *H. japonica* taxon B

---

|    | B1    | B2    | B3    | B4    | B5 |
|----|-------|-------|-------|-------|----|
| B1 | -     |       |       |       |    |
| B2 | 0.036 | -     |       |       |    |
| B3 | 0.039 | 0.021 | -     |       |    |
| B4 | 0.041 | 0.035 | 0.034 | -     |    |
| B5 | 0.042 | 0.036 | 0.036 | 0.017 | -  |

---
